# Supplementary material for: Bone marrow morphology is a strong discriminator between chronic eosinophilic leukemia, not otherwise specified and reactive idiopathic hypereosinophilic syndrome
Source: PubMed Central journal article supplement — Haematologica. 2017 May 11;102(8):1352–60. doi: 10.3324/haematol.2017.165340 (PMC5541870; doi:10.3324/haematol.2017.165340), 2017-08
Supplement: 2017.165340.WANG_SUPPL.pdf [file 2017.165340.WANG_SUPPL.pdf]

## Bone marrow morphology is a strong discriminator between chronic eosinophilic leukemia, not otherwise specified and reactive idiopathic hypereosinophilic syndrome

Sa A. Wang,<sup>1</sup> Robert P. Hasserjian,<sup>2</sup> Wayne Tam,<sup>3</sup> Albert G. Tsai,<sup>4</sup> Julia T. Geyer,<sup>3</sup> Tracy I. George,<sup>5</sup> Kathryn Foucar,<sup>5</sup> Heesun J. Rogers,<sup>6</sup> Eric D. Hsi,<sup>6</sup> Bryan A. Rea,<sup>7</sup> Adam Bagg,<sup>7</sup> Carlos E. Bueso-Ramos,<sup>1</sup> Daniel A. Arber,<sup>8</sup> Srdan Verstovsek<sup>9</sup> and Attilio Orazi<sup>3</sup>

<sup>1</sup>Department of Hematopathology, M.D. Anderson Cancer Center, Houston, TX; <sup>2</sup>Department of Pathology, Massachusetts General Hospital, Boston, MA; <sup>3</sup>Department of Pathology and Laboratory Medicine, Weill Cornell Medical College, New York, NY; <sup>4</sup>Department of Pathology, Stanford University, CA; <sup>5</sup>Department of Pathology, University of New Mexico, Albuquerque, NM; <sup>6</sup>Department of Laboratory Medicine, Cleveland Clinic, OH; <sup>7</sup>Department of Pathology and Laboratory Medicine, the University of Pennsylvania, Philadelphia, PA; <sup>8</sup>Department of Pathology and Laboratory Medicine, University of Chicago, IL and <sup>9</sup>Department of Leukemia, M.D. Anderson Cancer Center, Houston, TX, USA

©2017 Ferrata Storti Foundation. This is an open-access paper. doi:10.3324/haematol.2017.165340

Received: January 25, 2017.

Accepted: May 4, 2017.

Pre-published: May 11, 2017.

Correspondence: swang5@mdanderson.org

---

Supplementary Table 1: Detailed morphological features of bone marrow that were assessed to be abnormal (n=40)

---

25 cases with MDS-like, MPN-like or Mixed MDS and MPN-like megakaryocytes:

---

- 15/23 have abnormal eosinophils,
  - 3 with  $\geq 5\%$  blasts,
  - 6/24 MF2 or MF3 fibrosis,
  - 19/25 with a hypercellularity,
  - 6/24 with dysgranulopoiesis,
  - 8/24 dyserythropoiesis
- 

3 cases with dysgranulopoiesis and 1 case with dyserythropoiesis

---

- 1 also abnormal eosinophils,
  - 2 with hypercellularity
  - 1 with MF2 fibrosis
- 

11 cases showing at least two other abnormalities:

---

- 10 with hypercellularity;
  - 3 with MF3 fibrosis; 3 with MF2 fibrosis,
  - 4 with abnormal eosinophils:
  - 1 with a M:E ratio  $>10$ ;
  - 2 with markedly decreased megakaryocytes, 1 with abnormal megakaryocytes (subset)
-

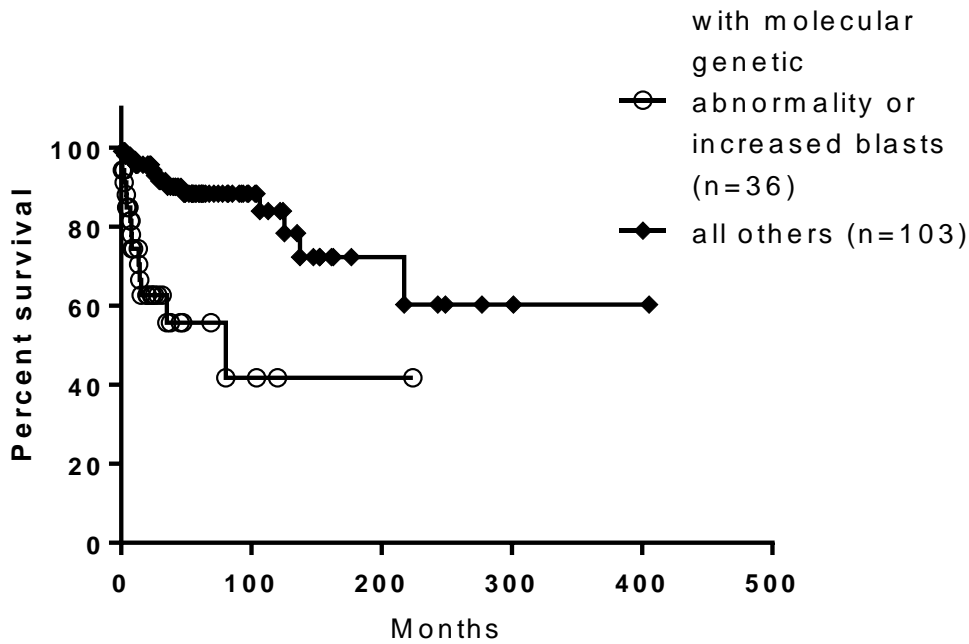

Suppl. Figure: Comparison of patients with an abnormal karyotype, and or positive mutations, or increased blasts (n=36) versus all other patients (n=103). Of note, in the latter group, mutations were only tested in 52 (52%) patients. The survival was 80.3 months vs not reached.
