# Supplementary material for: Bone marrow morphology is a strong discriminator between chronic eosinophilic leukemia, not otherwise specified and reactive idiopathic hypereosinophilic syndrome
Source: PubMed Central journal article supplement — Haematologica. 2017 May 11;102(8):1352–60. doi: 10.3324/haematol.2017.165340 (PMC5541870; doi:10.3324/haematol.2017.165340), 2017-08
Supplement: 2017_165340-Disclosures_and_Contributions.pdf [file 2017_165340-Disclosures_and_Contributions.pdf]

Haematologica  
HAEMATOL/2017/165340  
Version 4

Bone marrow morphology is a strong discriminator between chronic eosinophilic leukemia, not otherwise specified from reactive idiopathic hypereosinophilic syndrome

Sa A. Wang, Robert P. Hasserjian, Wayne Tam, Albert G. Tsai, Julia T. Geyer, Tracy I. George, Kathryn Foucar, Heesun J. Rogers, Eric D. Hsi, Bryan A. Rea, Adam Bagg, Carlos Bueso-Ramos C., Daniel A. Arber, Srdan Verstovsek, and Attilio Orazi

Disclosures: nothing to disclose

Contributions: SAW: design, review material, analyze data, and wrote the paper WT: perform molecular tests AO: design, perform and co-wrote the paper All members: collect data, review material and edit the manuscripts All authors read the manuscripts and edit the manuscript
